# Supplementary material
Source: PubMed Central journal article supplement (PMC9275376)
Supplement: NIHMS1796818-supplement-Supplement1.pdf [file NIHMS1796818-supplement-Supplement1.pdf]

## Overview of the Lake Michigan Ozone Study 2017

Charles O. Stanier, R. Bradley Pierce, Maryam Abdi-Oskouei, Zachariah E. Adelman, Jay Al-Saadi, Hariprasad D. Alwe, Timothy H. Bertram, Gregory R. Carmichael, Megan B. Christiansen, Patricia A. Cleary, Alan C. Czarnetzki, Angela F. Dickens, Marta A. Fuoco, Dagen D. Hughes, Joseph P. Hupy, Scott J. Janz, Laura M. Judd, Donna Kenski, Matthew G. Kowalewski, Russell W. Long, Dylan B. Millet, Gordon Novak, Behrooz Roozitalab, Stephanie L. Shaw, Elizabeth A. Stone, James Szykman, Lukas Valin, Michael Vermeuel, Timothy J. Wagner, Andrew R. Whitehill, and David J. Williams

<https://doi.org/10.1175/BAMS-D-20-0061.2>

Corresponding author: Charles O. Stanier, [charles-stanier@uiowa.edu](mailto:charles-stanier@uiowa.edu)

This is a supplement to <https://doi.org/10.1175/BAMS-D-20-0061.1>

©2021 American Meteorological Society

For information regarding reuse of this content and general copyright information, consult the [AMS Copyright Policy](#).

**AFFILIATIONS:** Stanier, Abdi-Oskouei,\* Carmichael, Christiansen, Hughes, Roozitalab, and Stone—University of Iowa, Iowa City, Iowa; Pierce and Wagner—Space Science and Engineering Center, University of Wisconsin–Madison, Madison, Wisconsin; Adelman and Kenski—Lake Michigan Air Directors Consortium, Chicago, Illinois; Al-Saadi and Judd—NASA Langley Research Center, Hampton, Virginia; Alwe and Millet—University of Minnesota, Twin Cities, Saint Paul, Minnesota; Bertram, Novak, and Vermeuel—University of Wisconsin–Madison, Madison, Wisconsin; Cleary—University of Wisconsin–Eau Claire, Eau Claire, Wisconsin; Czarnetzki—University of Northern Iowa, Cedar Falls, Iowa; Dickens—Lake Michigan Air Directors Consortium, Chicago, Illinois, and Wisconsin Department of Natural Resources, Madison, Wisconsin; Fuoco—U.S. EPA Region 5, Chicago, Illinois; Hupy—Purdue University, West Lafayette, Indiana; Janz and Kowalewski—NASA Goddard Space Flight Center, Greenbelt, Maryland; Long, Szykman, Valin, Whitehill, and Williams—Center for Environmental Measurement and Modeling, U.S. Environmental Protection Agency, Research Triangle Park, North Carolina; Shaw—Electric Power Research Institute, Palo Alto, California

\* **CURRENT AFFILIATION:** University Corporation for Atmospheric Research, Boulder, Colorado

## List of acronyms

|                   |                                                  |
|-------------------|--------------------------------------------------|
| AMF               | Air mass factor                                  |
| CAPS              | Cavity attenuated phase shift                    |
| DMS               | Dimethyl sulfide                                 |
| EC                | Elemental carbon                                 |
| GCMS              | Gas chromatograph mass spectrometer              |
| IEPA              | Illinois Environmental Protection Agency         |
| Lidar             | Laser detection and ranging                      |
| LPM               | Liters per minute                                |
| MACR              | Methacrolein                                     |
| MVK               | Methyl vinyl ketone                              |
| NERL              | National Exposure Research Laboratory            |
| NMVOG             | Non-methane volatile organic compound            |
| NO <sub>x</sub>   | Nitrogen oxides (NO + NO <sub>2</sub> )          |
| NO <sub>y</sub>   | Reactive nitrogen                                |
| OC                | Organic carbon                                   |
| PM                | Particulate matter                               |
| RH                | Relative humidity                                |
| PM <sub>2.5</sub> | Fine particulate matter (smaller than 2.5 μm)    |
| SODAR             | Sonic detection and ranging                      |
| U                 | Zonal (east–west) wind velocity component        |
| USEPA             | United States Environmental Protection Agency    |
| UWEC              | University of Wisconsin–Eau Claire               |
| V                 | Meridional (north–south) wind velocity component |
| WD                | Wind direction                                   |
| WS                | Wind speed                                       |

## Note for table ES1

The following sites are routine WDNR and IEPA sites where 1-min time resolution data were placed into the campaign repository. Normally, only 1-h data would be publicly available. Italics indicate locations in the table because instrumentation was added for the campaign. Other routine measurements may be available: please check USEPA AQS database; sites that are known to have other pollutants available (e.g., SO<sub>2</sub>, PM<sub>10</sub>, PM<sub>2.5</sub>, speciated PM<sub>2.5</sub>, NO<sub>x</sub>) are marked with an asterisk.

With meteorology (temperature, wind speed, and wind direction)

- Chiwaukee Prairie 55-059-0019, ozone, NO<sub>2</sub>, hourly PM<sub>2.5</sub>
- Kohler Andrae 55-117-0006, ozone
- Sheboygan Haven 55-117-0009, ozone
- Kenosha Water Tower 55-059-0025, ozone
- Lake Geneva, 55-127-0005, ozone
- Manitowoc 55-071-0007, ozone\*
- Newport Park 55-029-0004, ozone
- Harrington Beach 55-089-0009, ozone\*
- *Grafton 55-089-0008, ozone*
- *Milwaukee WDNR SERS 55-079-0026, ozone, NO<sub>x</sub>, NO, NO<sub>2</sub>, NO<sub>y</sub>, SO<sub>2</sub>\**

Air pollutants only

- Bayside 55-079-0085, ozone
- Kewaunee 55-061-0002, ozone
- Milwaukee, 16th St. 55-079-0010, ozone\*

- Racine 55-101-0020, ozone
- Chicago CTA, NO<sub>x</sub>
- Chicago Taft, NO<sub>x</sub>
- Cicero, NO<sub>x</sub>, ozone
- Evanston, ozone
- Northbrook, ozone, CO\*
- Schiller Park, NO<sub>x</sub>\*

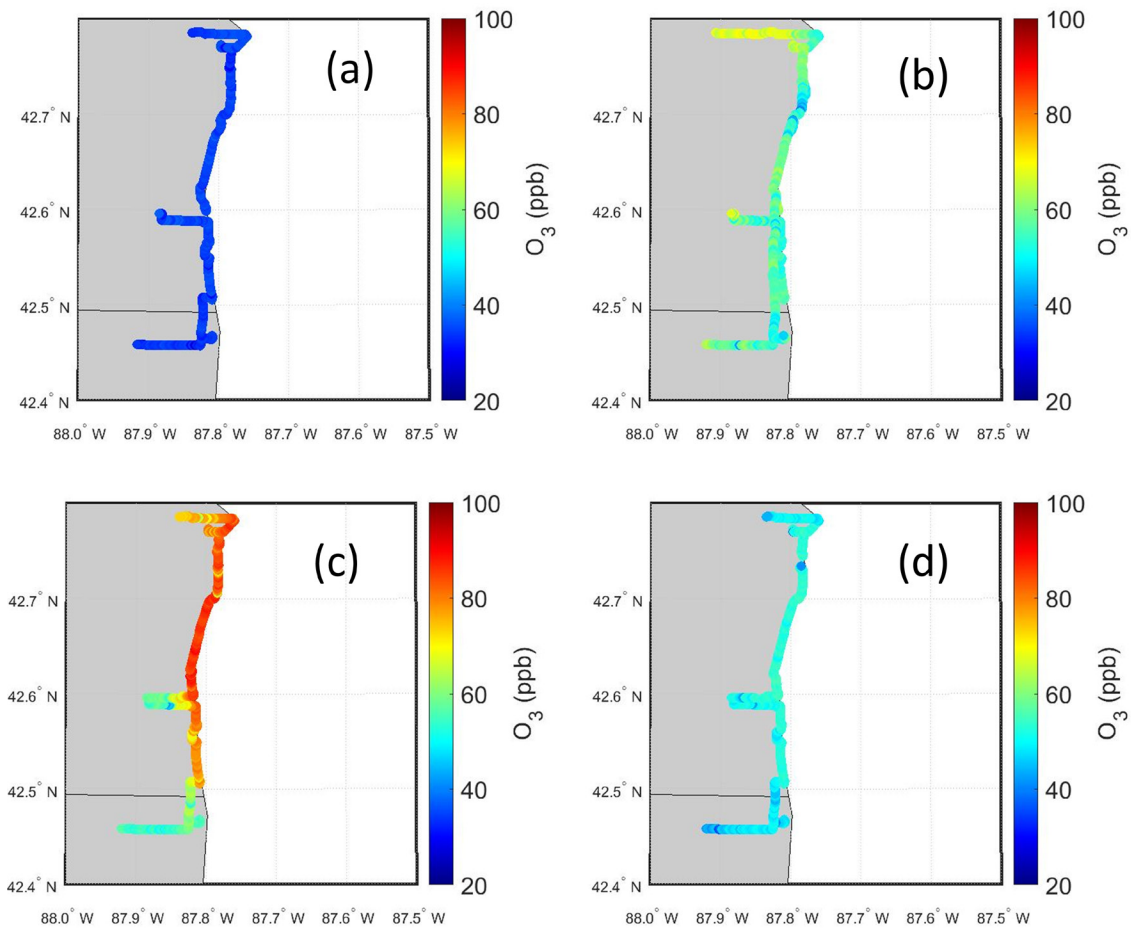

**Fig. ES1.** Ozone vs position for the GMAP vehicle on the four research drive days. (a) 6 Jun with low ozone and no lake breeze; (b) 8 Jun with moderate ozone and lake breeze with deep inland penetration; (c) 12 Jun with high ozone and lake breeze with shallow inland penetration; and (d) 13 Jun with no lake breeze. Panel (c) for 12 Jun is also part of Fig. 8 in the main paper.

**Table ES1. Site and instrument information. Instruments are in situ except where noted as “remotely sensed” in variables measured. Some routine monitoring locations did not have instrumentation added, but 1-min time resolution data were uploaded to the NASA repository from several sites during LMOS 2017, supplementing routine 1-h resolution data. See Note for Table ES1 for a listing. For a list of meteorological measurements near the Sheboygan and Zion enhanced monitoring sites, see Doak et al. (2021) supplement. See the List of Acronyms for the definitions of acronyms in the table.**

| Instrument                                                                                                    | Time interval | Variables measured                                                                                                                                                    | Principal investigator | Comments                                                                                                     |
|---------------------------------------------------------------------------------------------------------------|---------------|-----------------------------------------------------------------------------------------------------------------------------------------------------------------------|------------------------|--------------------------------------------------------------------------------------------------------------|
| <b>Site: Zion, IL (42.4676°N, 87.8100°W). AQS ID: 17-097-1007</b>                                             |               |                                                                                                                                                                       |                        |                                                                                                              |
| Ozone analyzer (Teledyne T400)                                                                                | 1 min         | Ozone                                                                                                                                                                 | IEPA                   | Routine monitor station/instrument                                                                           |
| 10-m meteorological tower (Met One)                                                                           | 1 min         | Temperature, WS, WD, RH, pressure, rainfall                                                                                                                           | IEPA                   | Data available starting 30 May 2017. Met One AIO Weather Sensor.                                             |
| NO <sub>x</sub> analyzer (Thermo 42i)                                                                         | 1 min         | NO, NO <sub>2</sub> , NO <sub>x</sub>                                                                                                                                 | Bertram                |                                                                                                              |
| CO analyzer (Thermo 48i)                                                                                      | N/A           | CO                                                                                                                                                                    | Bertram                | Data not reported in final R1 ICARRT file—Bertram group determined instrument failed calibration checks      |
| CIMS (Tofwerk AG, Switzerland, and Aerodyne Research Inc., USA)                                               | 1 min         | HNO <sub>3</sub> , H <sub>2</sub> O <sub>2</sub> , and others                                                                                                         | Bertram                | See Vermeuel et al. (2019)                                                                                   |
| Pyranometer (PSP, Eppley Laboratory)                                                                          | 1 min         | Solar radiation                                                                                                                                                       | Bertram                | Spectral range 295–2,800 nm                                                                                  |
| Aerosol particle sizer (TSI 3321)                                                                             | 2 min         | Particle size distribution (0.5–10 μm)                                                                                                                                | Stanier                | See Doak et al. (2021)                                                                                       |
| Condensation particle counter (TSI 3025A)                                                                     | 2 min         | Aerosol number concentration                                                                                                                                          | Stanier                | Data available starting 1 Jun                                                                                |
| Scanning mobility particle sizer (TSI 3936L85)                                                                | 2 min         | Particle size distribution (12–562 nm)                                                                                                                                | Stanier                | See Doak et al. (2021)                                                                                       |
| 1-nm Scanning mobility particle sizer (TSI 3938E57)                                                           | 2 min         | Particle size distribution (1–30 nm)                                                                                                                                  | Stanier                |                                                                                                              |
| Carbon dioxide analyzer (Vaisala flow-through GMP343)                                                         | 10 s          | CO <sub>2</sub>                                                                                                                                                       | Stanier                | Data available starting 15 Jun                                                                               |
| SO <sub>2</sub> analyzer (Teledyne 100E)                                                                      | 10 min        | SO <sub>2</sub>                                                                                                                                                       | Stanier                | Data available starting 28 May, UV fluorescence                                                              |
| Airbeam optical particle sensor                                                                               | 1 s           | PM <sub>2.5</sub>                                                                                                                                                     | Stanier                | PM <sub>2.5</sub> derived from optical particle counts by red light scattering, sensor is Shinyei PPD60PV-T2 |
| Audio volume from Android Verizon Ellipsis Tablet                                                             | 1 s           | Audio volume near train tracks as locomotive detection                                                                                                                | Stanier                | See Doak et al. (2021)                                                                                       |
| Proton Transfer Reaction Quadrupole Interface Time-of-Flight mass spectrometer (PTR-Qi-TOF, Ionicon Analytik) | 1 min         | Acetaldehyde, acetone, acetonitrile, benzene, aromatics (C8, C9, C10), carbonyls (C4, C5, C6), isoprene, methanol, methylfuran, monoterpenes, toluene, MVK/MACR       | Millet                 | See Millet et al. (2018) and Doak et al. (2021)                                                              |
| Medium-volume integrated filter samplers                                                                      | 12 h          | PM <sub>2.5</sub> mass, EC, OC, ions (sodium, potassium, magnesium, calcium, ammonium, chloride, nitrite, nitrate, sulfate), select metals, molecular organic tracers | Stone                  | See Hughes et al. (2021)                                                                                     |
| NMVOC by GCMS (TRACE 1310, ISQ LT, Thermo Scientific)                                                         | 60 min        | 45 NMVOC compounds, online trapping and analysis by GCMS                                                                                                              | Stone                  | Data available starting 8 Jun                                                                                |
| Acoustic profiler (miniSODAR, Atmospheric Systems Corporation)                                                | 2 min         | Remotely sensed horizontal WS and WD, vertical velocity, gust WS and WD, <i>U</i> and <i>V</i> component WS                                                           | Czarnetzki             | Vertical resolution 10 m from 30 to 200 m in altitude; see Abdi-Oskoueï et al. (2020)                        |
| Microwave radiometer (MP-3000A, Radiometrics)                                                                 | 3 min (avg)   | Remotely sensed temperature, RH, pressure. Rain sensor (binary) at surface.                                                                                           | Czarnetzki             | At varying angles and altitudes from 0 to 3 km (except rain)                                                 |
| Pandora spectrometer                                                                                          | 90 s (avg)    | Remotely sensed column O <sub>3</sub> and NO <sub>2</sub>                                                                                                             | Valin/Szykman          |                                                                                                              |

**Table ES1. Continued.**

| Instrument                                                                                                                                                     | Time interval | Variables measured                                                                                                                                     | Principal investigator | Comments                                                                                                                                                                                                                                                       |
|----------------------------------------------------------------------------------------------------------------------------------------------------------------|---------------|--------------------------------------------------------------------------------------------------------------------------------------------------------|------------------------|----------------------------------------------------------------------------------------------------------------------------------------------------------------------------------------------------------------------------------------------------------------|
| Vaisala CL51 Ceilometer                                                                                                                                        | 16 s (avg)    | Remotely sensed attenuated backscatter profiles (910 nm), aerosol layer heights, mixing layer heights                                                  | Szykman                |                                                                                                                                                                                                                                                                |
| Canisters analyzed for gases                                                                                                                                   | Varying       | 74 compounds analyzed, C2-10 NMVOC, halocarbons, select alkyl nitrates, OCS, DMS, CS <sub>2</sub> , and dimethyl disulfide                             | Blake                  | Canisters collected (30-min fill time) based on forecasted air quality to focus on high ozone periods. Data not in repository, collected a total of 35 canisters. Analysis and precleaned canisters from Don Blake's group, UC Irvine. See Blake et al. (1999) |
| Cimel Sunphotometer                                                                                                                                            | Varying       | Spectral AOD (1,640–340 nm), Angstrom exponent                                                                                                         | Pierce                 | Cloud cleared, quality assured with pre-field and post-field calibration applied data available at NASA Aeronet archive under "LMOS_Zion_Site" for June 2017; instrument relocated to Zion from Milwaukee SER on 4 Jun 2017.                                   |
| <b>Spaceport Sheboygan at Sheboygan Harbor (43.7456°N, 87.7087°W)</b>                                                                                          |               |                                                                                                                                                        |                        |                                                                                                                                                                                                                                                                |
| Aerodyne QCL-TILDAS (TDL Wintel v14.91)                                                                                                                        | 1 min         | HCHO, HCOOH, H <sub>2</sub> O                                                                                                                          | Whitehill/USEPA        | At 1,765 cm <sup>-1</sup>                                                                                                                                                                                                                                      |
| High Spectral Resolution lidar (HSRL)                                                                                                                          | 30 s (avg)    | Remotely sensed aerosol backscatter, extinction, and linear polarization                                                                               | Eloranta               | 0.1–3 km                                                                                                                                                                                                                                                       |
| Pandora spectrometer                                                                                                                                           | 90 s (avg)    | Remotely sensed column O <sub>3</sub> and NO <sub>2</sub>                                                                                              | Valin/Szykman          |                                                                                                                                                                                                                                                                |
| NO <sub>x</sub> analyzer (Teledyne-API T200U)                                                                                                                  | 1 min         | NO, NO <sub>2</sub> , NO <sub>x</sub>                                                                                                                  | Long                   |                                                                                                                                                                                                                                                                |
| NO <sub>2</sub> analyzer (Teledyne-API T500U CAPS)                                                                                                             | 1 min         | NO <sub>2</sub>                                                                                                                                        | Long                   |                                                                                                                                                                                                                                                                |
| NO <sub>y</sub> analyzer (Teledyne-API T200U NO <sub>y</sub> )                                                                                                 | 1 min         | NO <sub>y</sub> , NO                                                                                                                                   | Long                   | 10-m inlet height                                                                                                                                                                                                                                              |
| In situ meteorology (Vaisala WXT530)                                                                                                                           | 1 min         | Temperature, RH, pressure, WD, WS, rain                                                                                                                | Long                   | Met measurements at 10 m                                                                                                                                                                                                                                       |
| Ozone analyzer (2B Model 211)                                                                                                                                  | 1 min         | Ozone                                                                                                                                                  | Long                   |                                                                                                                                                                                                                                                                |
| Atmospheric Emitted Radiance Interferometer (AERI)                                                                                                             | 2 min         | Remotely sensed temp, water vapor, CH <sub>4</sub> , N <sub>2</sub> O, CO <sub>2</sub> , liquid water path, ice cloud optical depth, cloud base height | Wagner                 | Located in the SPARC Trailer, located NE side of the Spaceport Museum; profiles up to 3 km or cloud base (except rain), whichever is lower                                                                                                                     |
| Doppler lidar (WINDPRO)                                                                                                                                        | 2 min (avg)   | Remotely sensed WS, WD                                                                                                                                 | Wagner                 | Located in the SPARC Trailer, located NE side of the Spaceport Museum; reported at 44 vertical layers ranging from 140 m to 2.4 km.                                                                                                                            |
| <b>NASA UC-12 Aircraft, based in Madison, WI (Aircraft sampled at approximately 8-km flight altitude)</b>                                                      |               |                                                                                                                                                        |                        |                                                                                                                                                                                                                                                                |
| Geostationary Trace gas and Aerosol Sensor Optimization (GeoTASO)                                                                                              | Varying       | Remotely sensed CH <sub>2</sub> O, NO <sub>2</sub> (columns below aircraft)                                                                            | Judd/Al-Saadi/Janz     | See Judd et al. (2019)                                                                                                                                                                                                                                         |
| Airborne Hyper Angular Rainbow Polarimeter (AirHARP)                                                                                                           | Varying       | I, Q, and U Stokes parameters at 440, 550, 670, and 870 nm                                                                                             | J. Vanderlei Martins   | Dataset is Level 1B-R0 version that can be used for cloud and aerosol retrievals. See McBride et al. (2020) and Puthukkudy et al. (2020)                                                                                                                       |
| <b>Scientific Aviation (SA Mooney), Airport Base: Sheboygan County Municipal Airport (Aircraft sampled from the surface up to an altitude of about 3.1 km)</b> |               |                                                                                                                                                        |                        |                                                                                                                                                                                                                                                                |
| Ozone analyzer (2B Model 202)                                                                                                                                  | 1 s           | Ozone                                                                                                                                                  | Conley                 |                                                                                                                                                                                                                                                                |
| NO <sub>2</sub> analyzer (Aerodyne CAPS)                                                                                                                       | 1 s           | NO <sub>2</sub>                                                                                                                                        | Conley                 |                                                                                                                                                                                                                                                                |
| Cavity ring down spectrometer (Picarro 2301F)                                                                                                                  | 1 s           | CO <sub>2</sub> , CH <sub>4</sub> , H <sub>2</sub> O                                                                                                   | Conley                 |                                                                                                                                                                                                                                                                |

**Table ES1. Continued.**

| Instrument                                                                                                                                                                    | Time interval | Variables measured                                                                                   | Principal investigator | Comments                                                                                                                                                                    |
|-------------------------------------------------------------------------------------------------------------------------------------------------------------------------------|---------------|------------------------------------------------------------------------------------------------------|------------------------|-----------------------------------------------------------------------------------------------------------------------------------------------------------------------------|
| Meteorology (Vaisala HMP60)                                                                                                                                                   | 1 s           | Temperature, RH                                                                                      | Conley                 |                                                                                                                                                                             |
| Aspen Avionics PFD1000                                                                                                                                                        | 1 s           | Pressure, true airspeed, <i>U</i> , <i>V</i>                                                         | Conley                 | <i>U</i> and <i>V</i> wind components measured by difference between true airspeed and ground speed (Conley et al. 2014)                                                    |
| Hemisphere VS101 differential GPS                                                                                                                                             | 1 s           | Position, ground speed, <i>U</i> , <i>V</i>                                                          | Conley                 | <i>U</i> and <i>V</i> wind components measured by difference between true airspeed and ground speed (Conley et al. 2014)                                                    |
| <b>NOAA R5503 research vessel, based at Spaceport Sheboygan, WI</b>                                                                                                           |               |                                                                                                      |                        |                                                                                                                                                                             |
| Ozone analyzer (FEM 2B-205)                                                                                                                                                   | 1 min         | Ozone                                                                                                | Williams               | Ship position is also reported in the file with ozone, to $\pm 0.1^\circ$ accuracy based on linear interpolation in time between waypoints recorded in the ship transit log |
| <b>GMAP Truck Mobile, based at R5 office in Chicago, IL</b>                                                                                                                   |               |                                                                                                      |                        |                                                                                                                                                                             |
| Ozone analyzer (TEI49CPS, CR850 datalogger)                                                                                                                                   | 1 s           | Ozone                                                                                                | Fuoco                  |                                                                                                                                                                             |
| GPS and meteorology sensor                                                                                                                                                    | 1 s           | WS, WD, vehicle speed, position                                                                      | Fuoco                  |                                                                                                                                                                             |
| <b>UWEC Mobile</b>                                                                                                                                                            |               |                                                                                                      |                        |                                                                                                                                                                             |
| Ozone analyzer (2B POM)                                                                                                                                                       | 1 min         | Ozone                                                                                                | Cleary                 | 5 min at each stop                                                                                                                                                          |
| <b>Grafton (43.3430°N, 87.9200°W). AQS ID: 55-089-0008—Routine monitoring supplemented with Pandora and Ceilometer</b>                                                        |               |                                                                                                      |                        |                                                                                                                                                                             |
| Ozone analyzer                                                                                                                                                                | 1 min         | Ozone                                                                                                | WDNR                   | Routine monitor                                                                                                                                                             |
| Meteorology                                                                                                                                                                   | 1 min         | Temperature, WS, WD                                                                                  | WDNR                   | Routine observation                                                                                                                                                         |
| Pandora Spectrometer                                                                                                                                                          | 90 s (avg)    | Remotely sensed column O <sub>3</sub> and NO <sub>2</sub>                                            | Valin/Szykman          |                                                                                                                                                                             |
| Vaisala CL51 Ceilometer                                                                                                                                                       | 16 s (avg)    | Remotely sensed attenuated backscatter profiles (910 nm), aerosol layer heights, mixing layer height | Szykman                |                                                                                                                                                                             |
| <b>Schiller Park (41.965°N, 87.876°W). AQS ID: 17-031-3103—Routine monitoring supplemented with Pandora</b>                                                                   |               |                                                                                                      |                        |                                                                                                                                                                             |
| Ozone analyzer                                                                                                                                                                | 1 h           | Ozone                                                                                                | IEPA                   |                                                                                                                                                                             |
| PM <sub>2.5</sub>                                                                                                                                                             | 24 h          | PM <sub>2.5</sub> (gravimetric)                                                                      | IEPA                   | Every third day                                                                                                                                                             |
| NO <sub>x</sub> (Teledyne T500U)                                                                                                                                              | 1-min         | NO <sub>x</sub>                                                                                      | IEPA                   | LMOS Repository (hourly NO and NO <sub>2</sub> in USEPA AQS)                                                                                                                |
| Pandora Spectrometer                                                                                                                                                          | 90 s (avg)    | Remotely sensed column O <sub>3</sub> and NO <sub>2</sub>                                            | Valin/Szykman          |                                                                                                                                                                             |
| <b>Milwaukee WDNR SERS (43.0609°N, 87.9135°W). AQS ID: 55-079-0026—Routine monitoring supplemented with Pandora and Ceilometer</b>                                            |               |                                                                                                      |                        |                                                                                                                                                                             |
| NO <sub>2</sub> (Teledyne T500U)                                                                                                                                              | 1 min         | NO <sub>2</sub>                                                                                      | WDNR                   | Routine monitor                                                                                                                                                             |
| Ozone analyzer                                                                                                                                                                | 1 min         | Ozone                                                                                                | WDNR                   | Routine monitor                                                                                                                                                             |
| SO <sub>2</sub> analyzer                                                                                                                                                      | 1 min         | SO <sub>2</sub>                                                                                      | WDNR                   | Routine monitor                                                                                                                                                             |
| PM (Teledyne T640)                                                                                                                                                            | 1 min         | PM <sub>2.5</sub> , PM10                                                                             | WDNR                   | Routine monitor; at 16.7 LPM                                                                                                                                                |
| Meteorology                                                                                                                                                                   | 1 min         | Temperature, WS, WD                                                                                  | WDNR                   | Routine observation                                                                                                                                                         |
| NO <sub>x</sub> analyzer                                                                                                                                                      | 1 min         | NO <sub>x</sub> (NO, NO <sub>2</sub> )                                                               | WDNR                   | Routine monitor                                                                                                                                                             |
| Pandora spectrometer                                                                                                                                                          | 90 s (avg)    | Remotely sensed column O <sub>3</sub> and NO <sub>2</sub>                                            | Valin/Szykman          |                                                                                                                                                                             |
| Vaisala CL51 Ceilometer                                                                                                                                                       | 16 s (avg)    | Remotely sensed attenuated backscatter profiles (910 nm), aerosol layer heights, mixing layer height | Szykman                |                                                                                                                                                                             |
| <b>Sheboygan ozone network sites: Chamber of Commerce (43.74794°N, 87.71256°W), Fire Station (43.75935°N, 87.74003°W), Kolher Public Works Dept. (43.73721°N, 87.78052°W)</b> |               |                                                                                                      |                        |                                                                                                                                                                             |
| Ozone analyzer (2B POM)                                                                                                                                                       | 5 min (avg)   | Ozone                                                                                                | Long                   | Internal instrument data logging issues resulted in data completeness issues for all three sites.                                                                           |

**Table ES2. WRF-Chem ozone performance statistics stratified by ozone MDA8. The  $p$  values are one-sided, and significant  $p$  values were set at 0.025 (two-sided significance level of 0.05).**

| MDA ozone            | Zion            |     | Sheboygan KA    |     |
|----------------------|-----------------|-----|-----------------|-----|
|                      | Mean bias (ppb) | $n$ | Mean bias (ppb) | $n$ |
| Low (<50 ppb)        | +7.8 ppb        | 15  | +3.3 ppb        | 15  |
| Moderate (50–65 ppb) | +1.5 ppb        | 8   | −4.2 ppb        | 8   |
| High (>65 ppb)       | −4.6 ppb        | 6   | −10.2 ppb       | 6   |

## References

- Abdi-Oskouei, M., and Coauthors, 2020: Sensitivity of meteorological skill to selection of WRF-Chem physical parameterizations and impact on ozone prediction during the Lake Michigan Ozone Study (LMOS). *J. Geophys. Res. Atmos.*, **125**, e2019JD031971, <https://doi.org/10.1029/2019JD031971>.
- Blake, N. J., and Coauthors, 1999: Aircraft measurements of the latitudinal, vertical, and seasonal variations of NMHCs, methyl nitrate, methyl halides, and DMS during the First Aerosol Characterization Experiment (ACE 1). *J. Geophys. Res. Atmos.*, **104**, 21 803–21 817, <https://doi.org/10.1029/1999JD900238>.
- Conley, S. A., I. C. Faloona, D. H. Lenschow, A. Karion, and C. Sweeney, 2014: A low-cost system for measuring horizontal winds from single-engine aircraft. *J. Atmos. Oceanic Technol.*, **31**, 1312–1320, <https://doi.org/10.1175/JTECH-D-13-00143.1>.
- Doak, A. G., and Coauthors, 2021: Characterization of ground-based atmospheric pollution and meteorology sampling stations during the Lake Michigan Ozone Study 2017. *J. Air Waste Manage.*, **71**, 866–889, <https://doi.org/10.1080/10962247.2021.1900000>.
- Hughes, D. D., and Coauthors, 2021: PM<sub>2.5</sub> chemistry, organosulfates, and secondary organic aerosol during the 2017 Lake Michigan Ozone Study. *Atmos. Environ.*, **244**, 117939, <https://doi.org/10.1016/j.atmosenv.2020.117939>.
- Judd, L. M., and Coauthors, 2019: Evaluating the impact of spatial resolution on tropospheric NO<sub>2</sub> column comparisons within urban areas using high-resolution airborne data. *Atmos. Meas. Tech.*, **12**, 6091–6111, <https://doi.org/10.5194/amt-12-6091-2019>.
- McBride, B. A., J. V. Martins, H. M. J. Barbosa, W. Birmingham, and L. A. Remer, 2020: Spatial distribution of cloud droplet size properties from Airborne Hyper-Angular Rainbow Polarimeter (AirHARP) measurements. *Atmos. Meas. Tech.*, **13**, 1777–1796, <https://doi.org/10.5194/amt-13-1777-2020>.
- Millet, D. B., and Coauthors, 2018: Bidirectional ecosystem–atmosphere fluxes of volatile organic compounds across the mass spectrum: How many matter? *ACS Earth Space Chem.*, **2**, 764–777, <https://doi.org/10.1021/acsearthspacechem.8b00061>.
- Puthukkudy, A., and Coauthors, 2020: Retrieval of aerosol properties from Airborne Hyper-Angular Rainbow Polarimeter (AirHARP) observations during ACEPOL 2017. *Atmos. Meas. Tech.*, **13**, 5207–5236, <https://doi.org/10.5194/amt-13-5207-2020>.
- Vermeuel, M. P., and Coauthors, 2019: Sensitivity of ozone production to NO<sub>x</sub> and VOC along the Lake Michigan coastline. *J. Geophys. Res. Atmos.*, **124**, 10 989–11 006, <https://doi.org/10.1029/2019JD030842>.
